# Supplementary material for: Chemiluminescence DNA biosensor based on dual-amplification of thrombin and thiocyanuric acid-gold nanoparticle network
Source: Royal Society of Chemistry journal article supplement (doi:10.1039/b921167e), 2009-12-11
Supplement: b921167e.pdf [file b921167e.pdf]

Supplementary Material (ESI) for Analyst  
This journal is © The Royal Society of Chemistry 2010

Supporting information for

**Chemiluminescence DNA Biosensor Based on Dual-Amplification of  
Thrombin and Thiocyanuric Acid-Gold Nanoparticle Network**

Xuemei Li, Wei Li and Shusheng Zhang\*

*Key Laboratory of Eco-chemical Engineering, Ministry of Education, College of Chemistry and Molecular  
Engineering, Qingdao University of Science and Technology, Qingdao 266042, China*

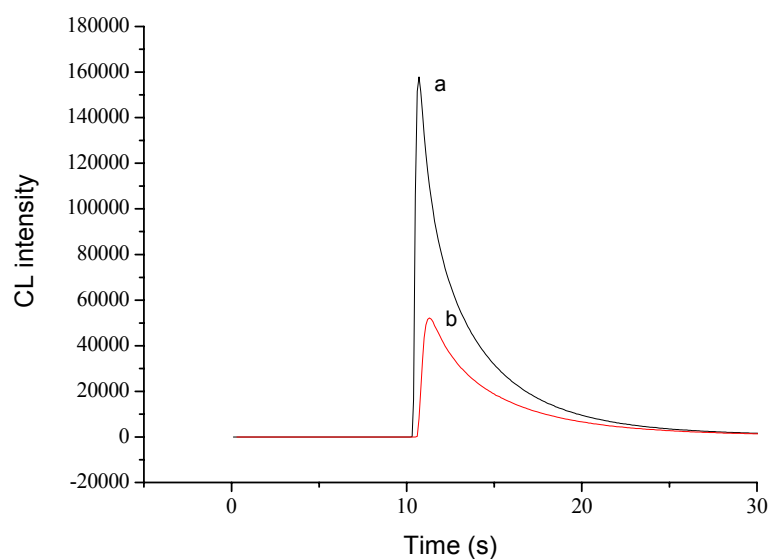

**Figure S1** Kinetics of CL emission obtained with different sample injection sequences. Experimental conditions:  $1.0 \times 10^{-4}$  M luminol in 0.1 M NaOH/NaHCO<sub>3</sub> and  $1.0 \times 10^{-4}$  g mL<sup>-1</sup> of Au<sup>3+</sup>. (a) Luminol was injected and (b) Au<sup>3+</sup> was injected

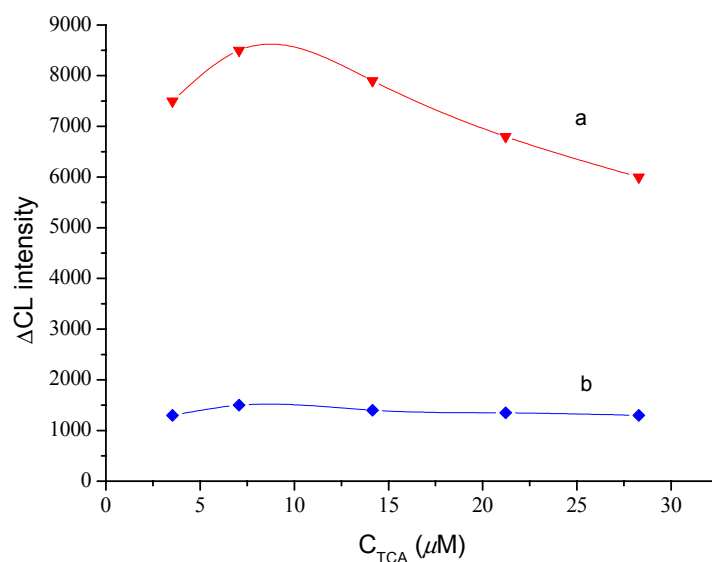

**Figure S2** CL intensity versus the concentration of TCA. The concentrations for target DNA: (a)  $3.0 \times 10^{-10}$  M, and (b)  $3.0 \times 10^{-14}$  M

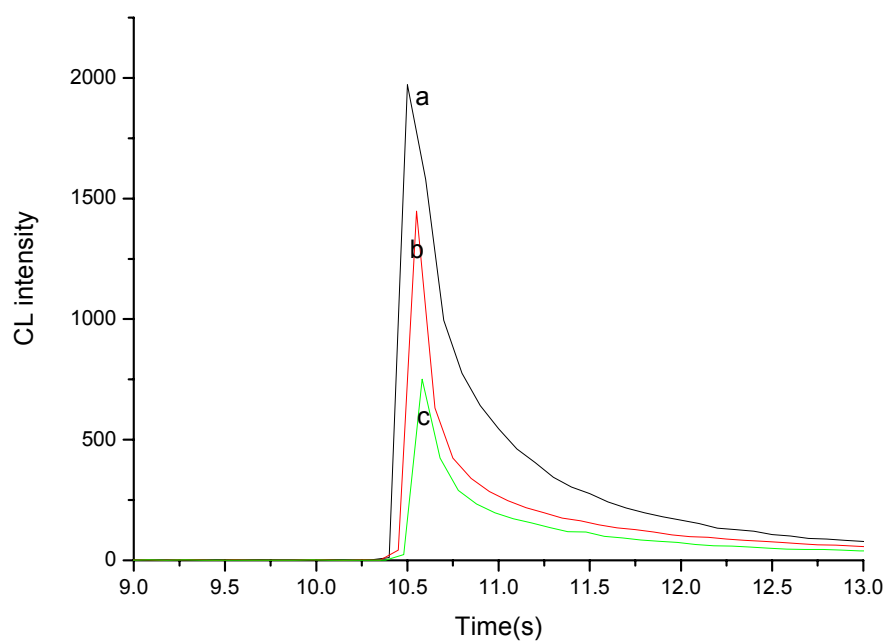

**Figure S3** Kinetics of CL emission obtained with different sizes of AuNPs. The concentration of target DNA was  $3.35 \times 10^{-14}$  M. The diameters of AuNPs were: (a) 17 nm, (b) 10 nm, (c) 40 nm

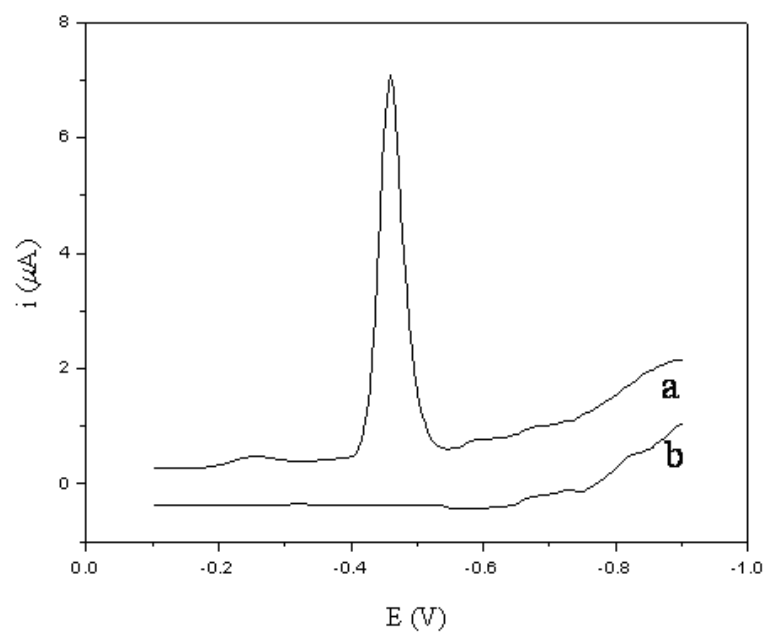

**Figure S4** Anodic stripping voltammetry analysis of (a) standard  $\text{Pb}^{2+}$  solution and (b) the CL detection solution

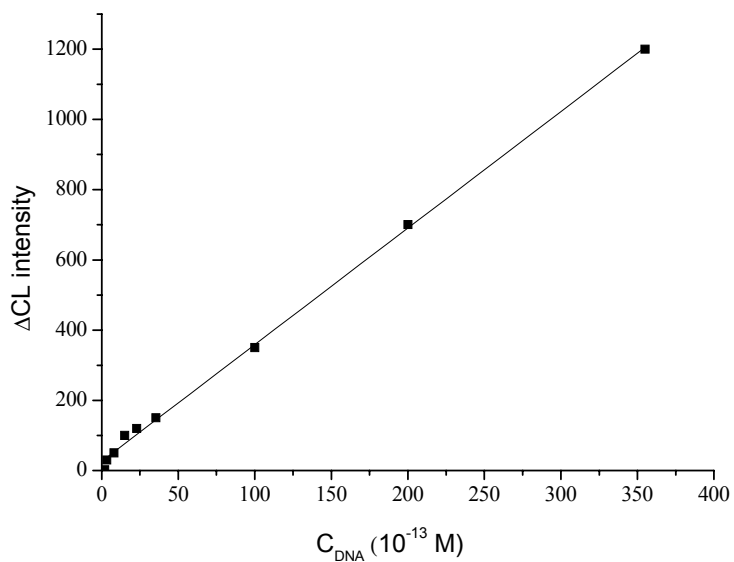

**Figure S5** The calibration curve for the determination of target DNA without TCA amplification
